# Supplementary material for: Recommendations for Identifying Valid Wear for Consumer-Level Wrist-Worn Activity Trackers and Acceptability of Extended Device Deployment in Children
Source: MDPI journal article supplement (doi:10.3390/s22239189), 2022-11-26
Supplement: s1 [file s1]

Table S1. Daily average Fitbit data for boys and girls (N=137)

|                                                  | Full Sample<br>Mean (SD)<br>n=137 | Girls<br>Mean (SD)<br>n=73 | Boys<br>Mean (SD)<br>n=64 |
|--------------------------------------------------|-----------------------------------|----------------------------|---------------------------|
| Average minutes valid awake time per day *       | 860.8 (90.8)                      | 839.0 (54.7)               | 885.7 (114.8)             |
| Average resting heart rate (beats per minute) ** | 74 (8)                            | 75 (7)                     | 71 (9)                    |
| Average steps per day ****                       | 10595 (3043)                      | 9615 (2223)                | 11731 (3461)              |
| Average steps per valid awake minute ***         | 12.6 (3.7)                        | 11.6 (2.8)                 | 13.8 (4.3)                |
| Minutes of MVPA/day****                          | 34.6 (30.7)                       | 19.9 (1.0)                 | 53.1 (4.8)                |

MVPA= Moderate and Vigorous Physical Activity.

Note: All best practice exclusions (see Table 7 in main article) applied.

When comparing boys vs. girls.

\*  $p < .05$ .

\*\*  $p < .01$ .

\*\*\*  $p < .001$

\*\*\*\*  $p < .0001$ .

Table S2. Daily average Fitbit data for weekdays vs. weekends (N=137 participants and 2082 days).

|                                            | Full Sample<br>Mean (SD)<br>n=2082 | Weekdays<br>Mean (SD)<br>n=1543 | Weekend Days<br>Mean (SD)<br>n=539 |
|--------------------------------------------|------------------------------------|---------------------------------|------------------------------------|
| Average minutes valid awake time per day * | 842.6 (124.1)                      | 848.0 (124.4)                   | 842.2 (110.0)                      |
| Average steps per day ***                  | 10821 (4664)                       | 11090 (4674)                    | 10051 (4547)                       |
| Average steps per valid awake minute **    | 12.9 (5.5)                         | 13.2 (5.4)                      | 12.3 (5.5)                         |
| Minutes of MVPA/day***                     | 35.4 (45.4)                        | 37.5 (47.3)                     | 29.7 (40.5)                        |

MVPA= Moderate and Vigorous Physical Activity.

Note: All best practice exclusions (see Table 7 in main article) applied.

When weekday days vs. weekend days.

\*  $p < .05$ .

\*\*  $p < .01$ .

\*\*\*  $p < .0001$ .

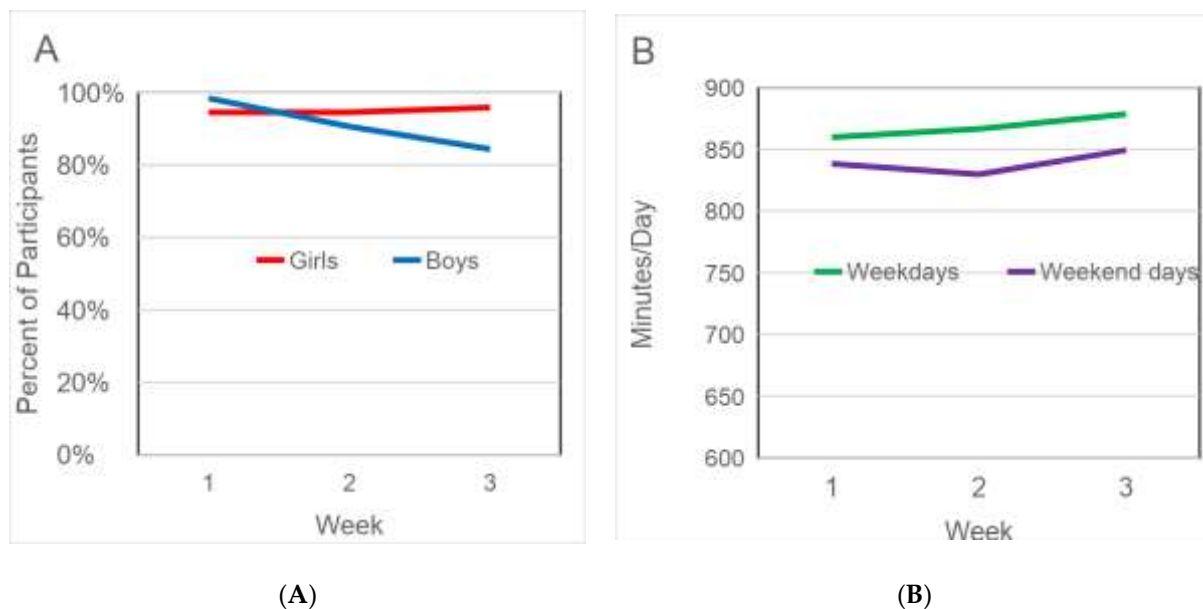

**Figure S1.** Percent of participants with 4+ valid days of wear (including 1+ weekend day) per week (A), and average number of minutes of valid, awake wear time per day (B) across the 3-week protocol (N=137).

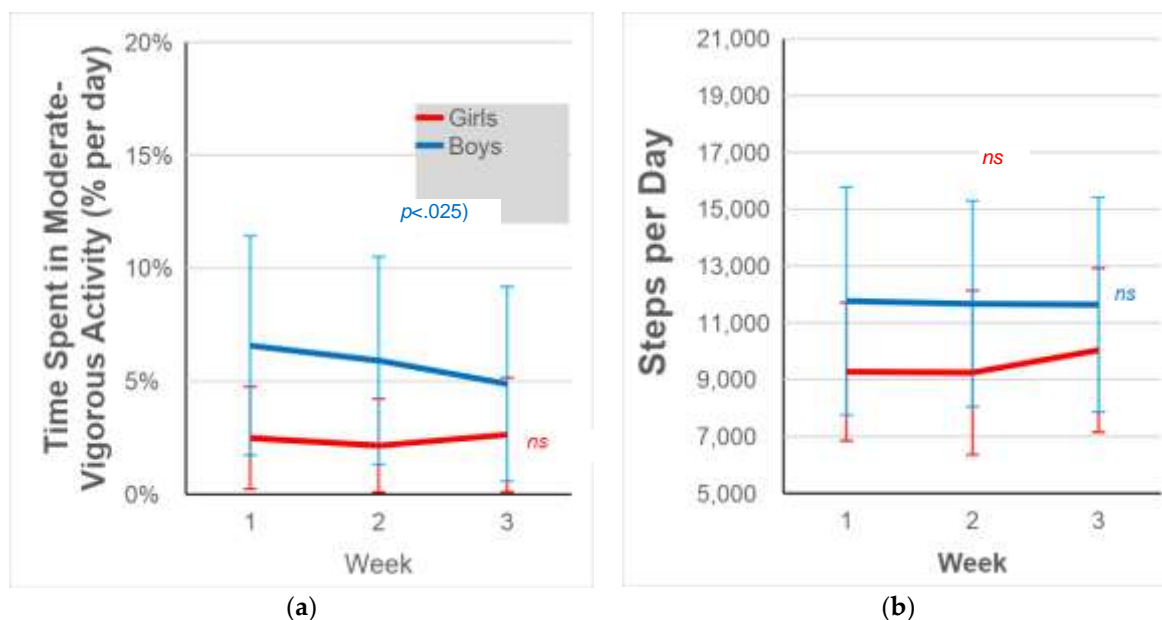

**Figure S2.** Fitbit-recorded activity was similar during Week 1 versus Week 3 of the 3-week protocol, suggested relatively limited reactivity, with exception of boys showing a gradual reduction in moderate to vigorous activity over the 3 weeks ( $p < .025$ ).
